# Supplementary material for: Per(6-guanidino-6-deoxy)cyclodextrins: synthesis, characterisation and binding behaviour toward selected small molecules and DNA
Source: Royal Society of Chemistry journal article supplement (doi:10.1039/b614899a), 2006-11-23
Supplement: b614899a.pdf [file b614899a.pdf]

## SUPPORTING INFORMATION

### ***Per(6-guanidino-6-deoxy)cyclodextrins: Synthesis, characterisation and binding behaviour toward selected small molecules and DNA.***

Nikolaos Mourtzis,<sup>a</sup> Kyriaki Eliadou,<sup>a</sup> Chrysie Aggelidou, Vassiliki Sophianopoulou<sup>b</sup>  
Irene M. Mavridis,<sup>a</sup> Konstantina Yannakopoulou<sup>a\*</sup>

<sup>a</sup>*Institute of Physical Chemistry, <sup>b</sup>Institute of Biology, National Center for Scientific Research “Demokritos” Aghia Paraskevi 15310, Athens, Greece*

E-mail: [dyanna@chem.demokritos.gr](mailto:dyanna@chem.demokritos.gr)

#### **Experimental Section**

**General.** The 1D and 2D NMR spectra were acquired at 500 MHz in DMSO-*d*<sub>6</sub> or D<sub>2</sub>O, as indicated. Some <sup>13</sup>C NMR spectra were acquired on an AC 250 instrument at 62.9 MHz. The 2D spectra COSY and HSQC were acquired using the pulse sequences provided by the instrument's software employing gradient selection. Dimethylformamide (DMF) was dried over CaH<sub>2</sub> for 48 h and then distilled under reduced pressure. Cyclodextrins were dried under vacuum at 80 °C overnight. Triphenyl phosphine was freshly recrystallized from hexane. *N,N*-Diisopropylethylamine (DIPEA) and pyrazole-1*H*-carboxamidine hydrochloride were used as received.

REFERENCES ARE NUMBERED AS IN THE MAIN TEXT.

***Hexakis(6-bromo-6-deoxy)-α-cyclodextrin (1a).*** It was prepared according to ref. 4a in 86% yield (presence of ~2% residual Ph<sub>3</sub>PO); mp = 195-197 °C; lit<sup>7a</sup> mp = 222 °C; mp lit<sup>7c</sup> mp = 195-196 °C; <sup>1</sup>H (DMSO-*d*<sub>6</sub>, 500 MHz) δ 5.81 (d, *J* = 6.8 Hz, 6H, OH2), 5.66 (d, *J* = 2.2 Hz, 6H,

OH3), 4.94 (d,  $J = 2.7$  Hz, 6H, H1), 3.92-3.98 (m, 12H, H5, H6), 3.81 (t,  $J = 8.4$ , 6H, H3), 3.74 (dd,  $J = 17.6$  Hz,  $J = 6.6$  Hz, 6H, H6'), 3.42 (t,  $J = 8.9$  Hz, 6H, H4), 3.35 – 3.32 (m, 6H, H2) ppm;  $^{13}\text{C}$  (DMSO- $d_6$ , 125 MHz)  $\delta$  102.75 (C1), 85.59 (C4), 73.37 (C3), 72.53 (C2), 71.52 (C5), 35.68 (C6) ppm, in agreement with the corresponding lit.<sup>7a</sup> data.

**Heptakis(6-bromo-6-deoxy)- $\beta$ -cyclodextrin (1b).** It was prepared according to ref. 4a in 85% yield (presence of ~5% residual  $\text{Ph}_3\text{PO}$ ); mp = 212 °C; lit<sup>7a</sup> mp = 214 °C; lit<sup>7c</sup> mp = 205-206 °C; lit<sup>7d</sup> mp = 300 °C;  $^1\text{H}$  NMR (DMSO- $d_6$ , 500 MHz)  $\delta$  6.02 (d,  $J = 6.4$  Hz, 7H, OH2), 5.89 (br s, 7H, OH3), 4.98 (d,  $J = 2.9$  Hz, 7H, H1), 4.00 (d,  $J = 10.3$  Hz, 7H, H6), 3.82 (t,  $J = 7.9$  Hz, 7H, H5), 3.69 - 3.62 (m, 14H, H6', H3), 3.40- 3.34 (m, 14H, H2, H4) ppm;  $^{13}\text{C}$  (DMSO- $d_6$ , 62.9 MHz)  $\delta$  102.08 (C1), 84.59 (C4), 72.25 (C3), 72.03(C2), 70.98 (C5), 34.42 (C6) ppm, in agreement with the corresponding lit.<sup>7a</sup> data.

**Octakis(6-bromo-6-deoxy)- $\gamma$ -cyclodextrin (1c).** It was prepared according to ref. 4a in 86% yield (presence of ~2% residual  $\text{Ph}_3\text{PO}$ ); mp = 196-198 °C; lit<sup>5c</sup> mp = 201-202 °C;  $^1\text{H}$  NMR (DMSO- $d_6$ , 500 MHz)  $\delta$  6.00 (d,  $J = 6.4$  Hz, 8H, OH2), 5.97 (br s, 8H, OH3), 5.01 (d,  $J = 2.6$  Hz, 8H, H1), 3.98 (d,  $J = 10.0$  Hz, 8H, H6), 3.81 (t,  $J = 8.0$  Hz, 8H, H5), 3.68 (dd,  $J = 8.0$  Hz,  $J = 10.0$  Hz, 8H, H6'), 3.61 (t,  $J = 8.8$  Hz, 8H, H3), 3.40-3.34 (m, 16H, H2, H4) ppm;  $^{13}\text{C}$  (DMSO- $d_6$ , 125 MHz)  $\delta$  101.9 (C1), 83.93 (C4), 72.15 (C2), 72.06 (C3), 70.89 (C5), 34.26 (C6-Br) ppm, in agreement with the corresponding lit.<sup>7e</sup> data.

**Hexakis(6-azido-6-deoxy)- $\alpha$ -cyclodextrin (2a).** It was prepared according to ref. 8 in 98% yield; mp = 235-236 °C;  $^1\text{H}$  NMR (DMSO- $d_6$ , 298K, 500 MHz)  $\delta$  5.65 (d,  $J = 7.0$  Hz, 6H, OH2), 5.47 (d,  $J = 2.4$  Hz, 6H, OH3), 4.88 (d,  $J = 3.3$  Hz, 6H, H1), 3.84-3.75 (m, 6H, H5), 3.77-3.70 (m, 12H, H6, H3), 3.58 (dd,  $J = 13.2$  Hz,  $J = 7.0$  Hz, 6H, H6'), 3.42-3.30 (m, 12H, H2, H4, partially overlapping with the residual HDO signal) ppm;  $^{13}\text{C}$  NMR (DMSO- $d_6$ , 125

MHz)  $\delta$  101.79 (C1), 83.41 (C4), 72.72 (C3), 71.59 (C2), 70.41 (C5), 51.37 (C6) ppm, in agreement with the corresponding lit.<sup>1,7e</sup> data.; IR (KBr pellet): 3368 (br, str, OH); 2920 (str, CH.); 2097 (str, -N<sub>3</sub>); 1654 (str) cm<sup>-1</sup>.

**Heptakis(6-azido-6-deoxy)- $\beta$ -cyclodextrin (2b)**; It was prepared according to ref. 8; Yield 96% mp = 241-242 °C; lit.<sup>3a</sup> mp = 240-245 °C (dec); <sup>1</sup>H NMR (DMSO-*d*<sub>6</sub>, 298K, 500 MHz)  $\delta$  5.90 (br s, 14H, OH<sub>2</sub>), 5.75 (br s, 14H, OH<sub>3</sub>), 4.91 (d, *J* = 2.7 Hz, 7H, H<sub>1</sub>), 3.78 (d, *J* = 12.3 Hz, 7H, H<sub>6</sub>), 3.73 (t, *J* = 9.3 Hz, 7H, H<sub>3</sub>), 3.60 (m, 14H, H<sub>6'</sub>, H<sub>5</sub>), 3.37 (m, 7H, H<sub>2</sub>), partially overlapping with 3.34 (m, 7H, H<sub>4</sub>) ppm; <sup>13</sup>C NMR (DMSO-*d*<sub>6</sub>, 298K, 125 MHz)  $\delta$  102.15 (C1), 83.12 (C4), 72.77 (C5), 71.95 (C2), 70.31 (C3), 51.22 (C6-N<sub>3</sub>) ppm, in agreement with lit.<sup>8</sup> <sup>13</sup>C NMR data in the same solvent; IR (KBr pellet): 3377 (br, str O-H); 2920 (str, C-H.); 2099 (str, -N<sub>3</sub>); 1654 (str) cm<sup>-1</sup>.

**Octakis(6-azido-6-deoxy)- $\gamma$ -cyclodextrin (2c)**. It was prepared according to ref. 8 in 75% yield; mp = 210-212 °C; <sup>1</sup>H NMR (DMSO-*d*<sub>6</sub>, 298K, 500 MHz)  $\delta$  5.92 (d, *J* = 7.2 Hz, 8H, OH<sub>2</sub>), 5.86 (d, *J* = 2.0 Hz, 8H, OH<sub>3</sub>), 4.94 (d, *J* = 3.5 Hz, 8H, H<sub>1</sub>), 3.74 (m, 8H, H<sub>5</sub>), 3.73 (d, *J* = 11.6 Hz, 8H, H<sub>6</sub>), 3.58 (8H, H<sub>6'</sub>) overlapping with 3.57 (H<sub>3</sub>, 8H), 3.39 (m, 8H, H<sub>2</sub>), overlapping with 3.35 (t, *J* = 8.8 Hz, 8H, H<sub>4</sub>) ppm; <sup>13</sup>C NMR (DMSO-*d*<sub>6</sub>, 298K, 125 MHz)  $\delta$  101.9 (C1), 82.44 (C4), 72.25 (C3), 72.01 (C2), 70.20 (C5), 51.07 (C6-N<sub>3</sub>) ppm, in agreement with lit.<sup>3a, 7e</sup> data. IR (KBr pellet): 3358 (br, str, OH); 2916 (str, CH.); 2098 (str, -N<sub>3</sub>); 1654 (str) cm<sup>-1</sup>.

**Hexakis(6-amino-6-deoxy)- $\alpha$ -cyclodextrin (3a)**. It was prepared according to ref. 8 in 70% yield (free base); mp = 389-390 °C (dec); <sup>1</sup>H NMR (D<sub>2</sub>O/DCI, 298K, 500 MHz)  $\delta$  5.16 (d, *J* = 3.2 Hz, 6H, H<sub>1</sub>), 4.19 (m, 6H, H<sub>5</sub>), 4.01 (t, *J* = 9.0 Hz, 6H, H<sub>3</sub>), 3.67 (dd, *J* = 3.1 Hz, *J* = 10.5 Hz, 6H, H<sub>2</sub>), 3.59 (t, *J* = 9.0 Hz, 6H, H<sub>4</sub>), 3.44 (dd, *J* = 3.0 Hz, *J* = 13.5 Hz, 6H, H<sub>6</sub>), 3.26 (dd,

$J = 6.5$  Hz,  $J = 13.5$  Hz, 6H, H6') ppm;  $^{13}\text{C}$  ( $\text{D}_2\text{O}/\text{DCl}$ , 125 MHz)  $\delta$  101.6 (C1), 82.67 (C4), 72.82 (C3), 71.60 (C2), 68.40 (C5), 40.56 (C6-NH<sub>2</sub>) ppm, in agreement with lit.<sup>3a</sup> data;  $^1\text{H}$  NMR ( $\text{DMSO}-d_6$ , 298K, 500 MHz)  $\delta$  8.26 (br s, disappears with  $\text{D}_2\text{O}$ , NH<sub>2</sub>), 5.62 (br m, diminishes with  $\text{D}_2\text{O}$ , 12H, OH<sub>2</sub>, OH<sub>3</sub>), 5.08 (d,  $J = 2.6$  Hz, 6H, H1), 4.26 (br t,  $J = 8$  Hz, 6H, H5), 3.86 (t,  $J = 9.5$  Hz, 6H, H3), 3.54 (t,  $J = 9.2$  Hz, 6H, H4), 3.45 (dd,  $J = 2.7$  Hz,  $J = 9.7$  Hz, 6H, H2), 3.39 (d,  $J = 12.9$  Hz, 6H, H6), 3.01 (m, 6H, H6') ppm.

**Heptakis(6-amino-6-deoxy)- $\beta$ -cyclodextrin (3b).** It was prepared according to ref. 8 in 61% yield (free base); mp = 392 °C (dec)  $^1\text{H}$  NMR ( $\text{D}_2\text{O}/\text{DCl}$ , 298K, 500 MHz)  $\delta$  5.13 (d,  $J = 3.0$  Hz, 7H, H1), 4.15 (m, 7H, H5), 3.95 (t,  $J = 9.7$  Hz, 7H, H3), 3.64 (dd,  $J = 9.7$  Hz,  $J = 3.0$  Hz, 7H, H2), 3.55 (t,  $J = 9.5$  Hz, 7H, H4), 3.40 (dd,  $J = 13.3$  Hz,  $J = 2.6$  Hz, 7H, H6), 3.23 (dd,  $J = 13.3$  Hz,  $J = 6.7$  Hz, 7H, H6') ppm;  $^{13}\text{C}$  ( $\text{D}_2\text{O}/\text{DCl}$ , 125 MHz)  $\delta$  100.9 (C1), 81.65 (C4), 71.52 (C3), 71.12 (C2), 67.39 (C5), 39.52 (C6-NH<sub>2</sub>) ppm, in agreement with lit.<sup>3a</sup> data.  $^1\text{H}$  NMR ( $\text{DMSO}-d_6$ , 298K, 500 MHz)  $\delta$  8.23 (br s, NH<sub>2</sub>), 5.93 (d,  $J = 6.60$  Hz, 6H, OH<sub>2</sub>), 5.84 (br s, 6H, OH<sub>3</sub>) 5.05 (br s, 6H, H1), 4.04 (t,  $J = 8.1$  Hz, 6H, H5), 3.64 (t,  $J = 9.2$  Hz, 6H, H3), 3.49 (t,  $J = 8.8$  Hz, 6H, H4), 3.42 (br s, 6H, H2), 3.30 (H6 hidden under HDO peak), 3.03 (m, 6H, H6') ppm.

**Octakis(6-amino-6-deoxy)- $\gamma$ -cyclodextrin (3c).** It was prepared according to ref. 8 in 75% yield (free base); mp = 396-397 °C (dec)  $^1\text{H}$  NMR ( $\text{D}_2\text{O}/\text{DCl}$ , 298K, 500 MHz)  $\delta$  5.20 (d,  $J = 3.5$  Hz, 8H, H1), 4.13 (m, 8H, H5), 3.93 (t,  $J = 9.7$  Hz, 8H, H3), 3.63 (dd,  $J = 9.7$  Hz,  $J = 3.5$  Hz, 8H, H2), 3.55 (t,  $J = 9.5$  Hz, 8H, H4), 3.41 (dd,  $J = 13.5$  Hz,  $J = 2.5$  Hz, 8H, H6), 3.22 (dd,  $J = 13.5$  Hz,  $J = 8.3$  Hz, 8H, H6') ppm;  $^{13}\text{C}$  ( $\text{D}_2\text{O}/\text{DCl}$ , 125 MHz)  $\delta$  99.88 (C1), 80.35 (C4), 71.23 (C3), 71.00 (C2), 67.01 (C5), 39.55 (C6-NH<sub>2</sub>) ppm, in agreement with lit.<sup>3a</sup> data.

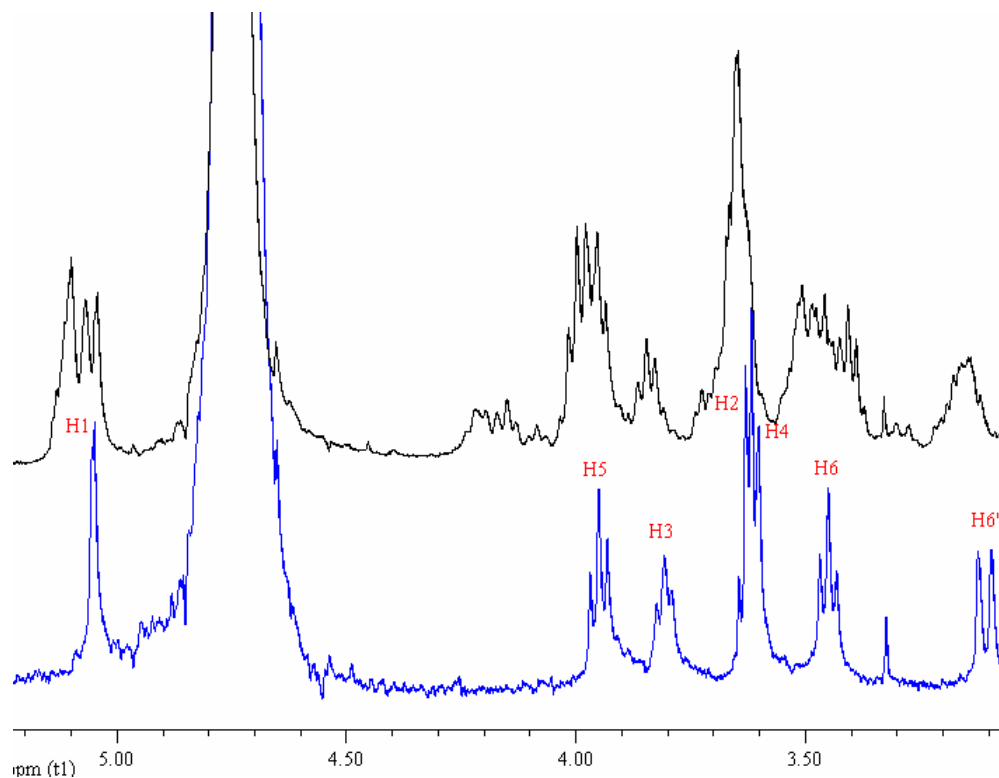

**Supporting Figure 1.** *Bottom:*  $^1\text{H}$  NMR spectrum of *hexakis*(6-amino-6-deoxy)- $\alpha$ -cyclodextrin hydrochloride (**3a**) in  $\text{D}_2\text{O}$  at pH ~3 (DCl) , corresponding to a symmetrical  $\alpha$ -cyclodextrin derivative i.e. fully aminated in the primary side and protonated. *Top:*  $^1\text{H}$  NMR spectrum of **3a** in  $\text{D}_2\text{O}$  at pH 7 showing complete breaking of the symmetry. The  $^{13}\text{C}$  spectrum was the same in both cases.

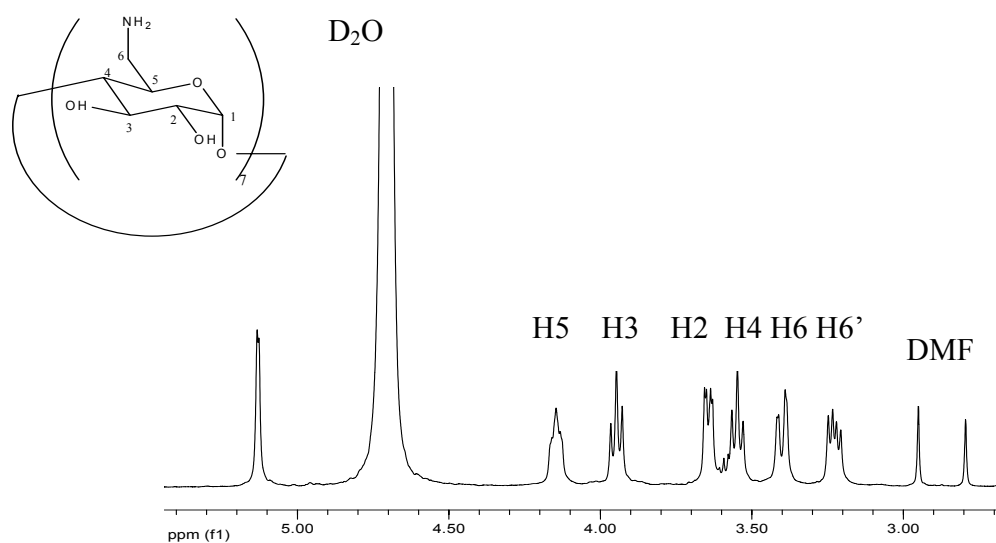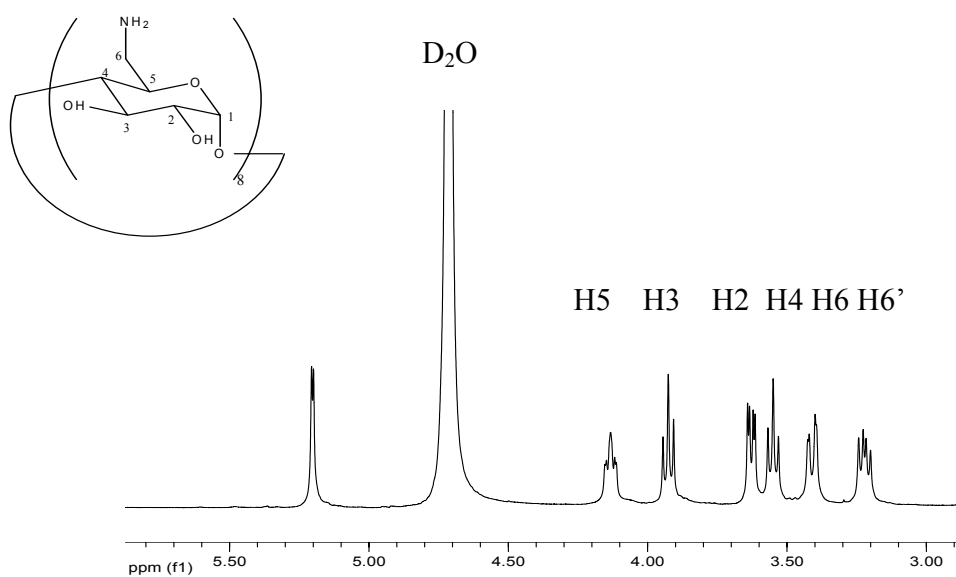

**Supporting Figure 2.** *Top:*  $^1\text{H}$  NMR spectrum of *heptakis*(6-amino-6-deoxy)- $\beta$ -cyclodextrin hydrochloride (**3b**) in  $\text{D}_2\text{O}$ . *Bottom:*  $^1\text{H}$  NMR spectrum of *octakis*(6-amino-6-deoxy)- $\gamma$ -cyclodextrin hydrochloride (**3c**).

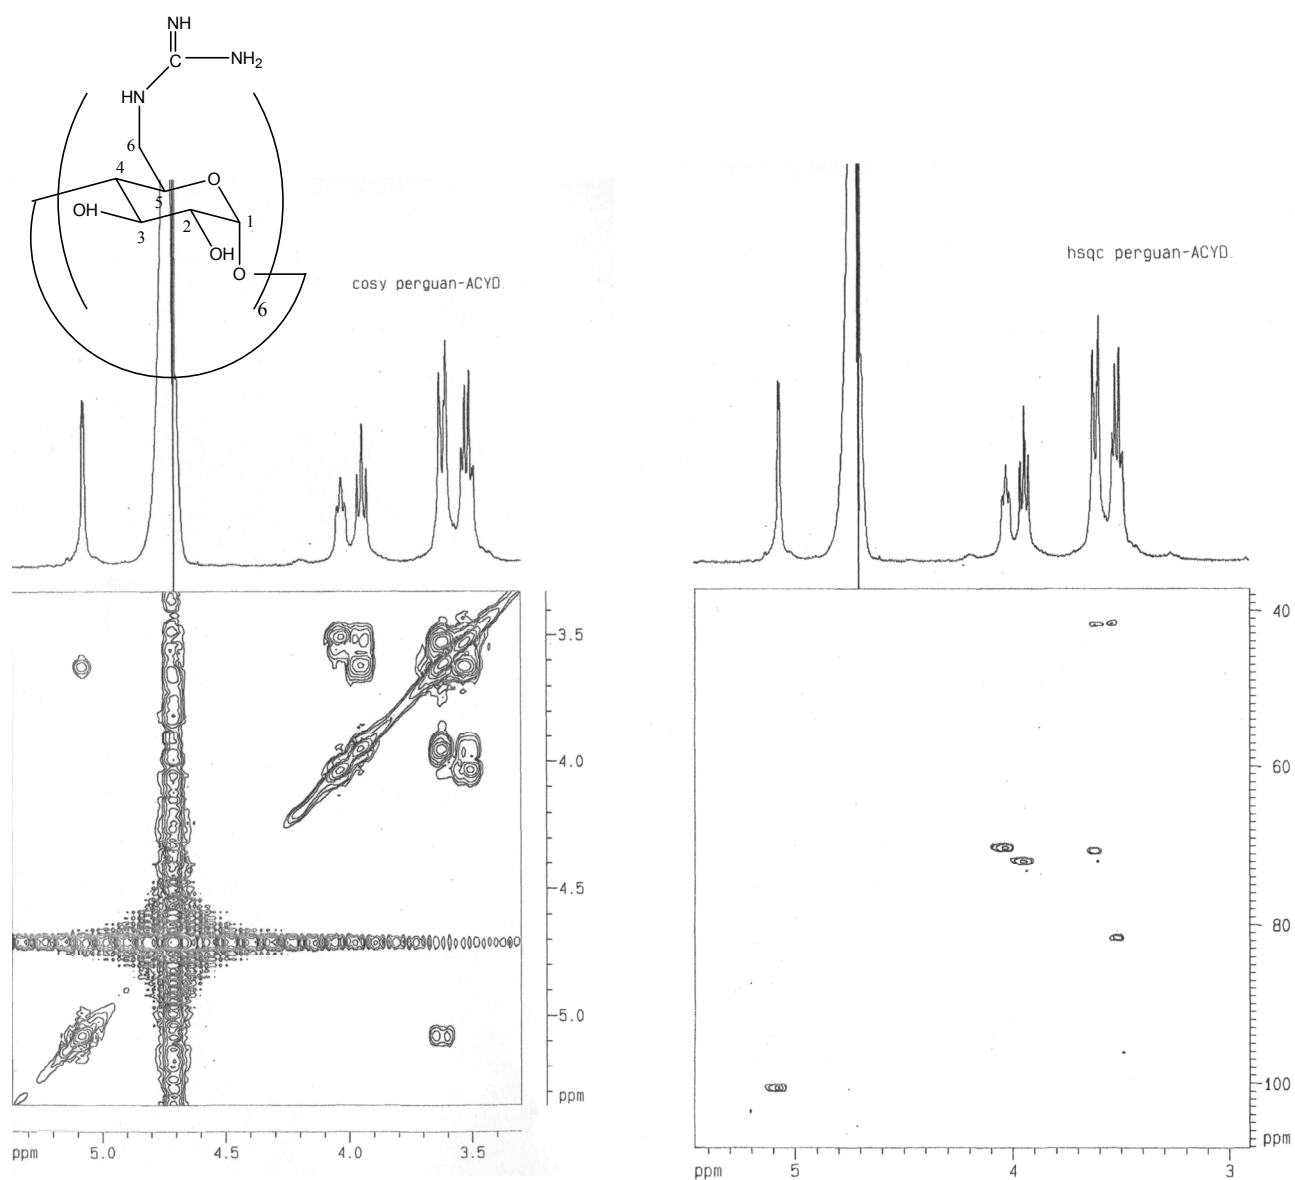

**Supporting figure 3.** *Left:* Partial  $^1\text{H}$ - $^1\text{H}$  correlation, and *Right:* Partial  $^1\text{H}$ - $^{13}\text{C}$  correlation NMR spectrum of hexakis(6-guanidino-6-deoxy)- $\alpha$ -cyclodextrin hydrochloride (**4a**), in  $\text{D}_2\text{O}$ .

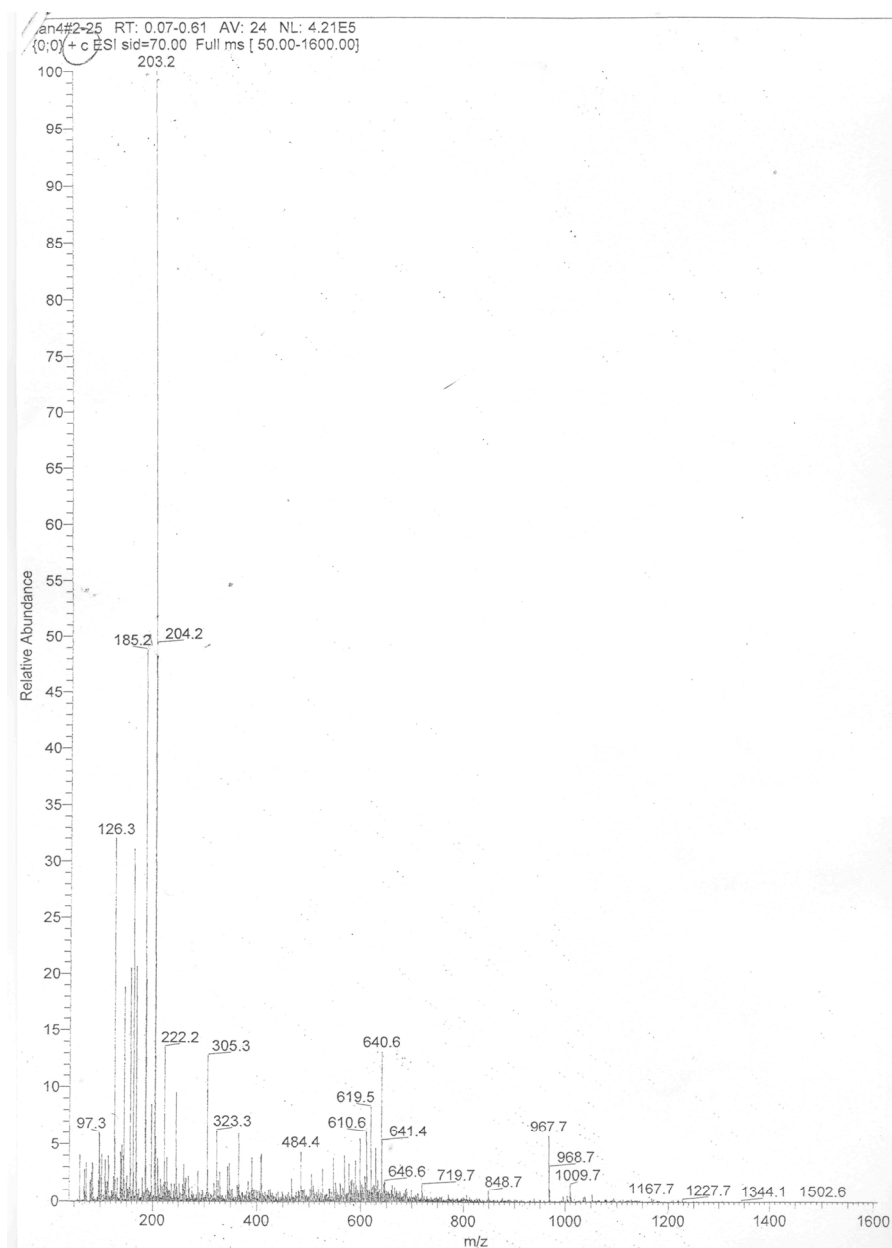

**Supporting figure 4.** ESI mass spectrum of *hexakis*(6-guanidino-6-deoxy)- $\alpha$ -cyclodextrin hydrochloride (**4a**), in positive mode.



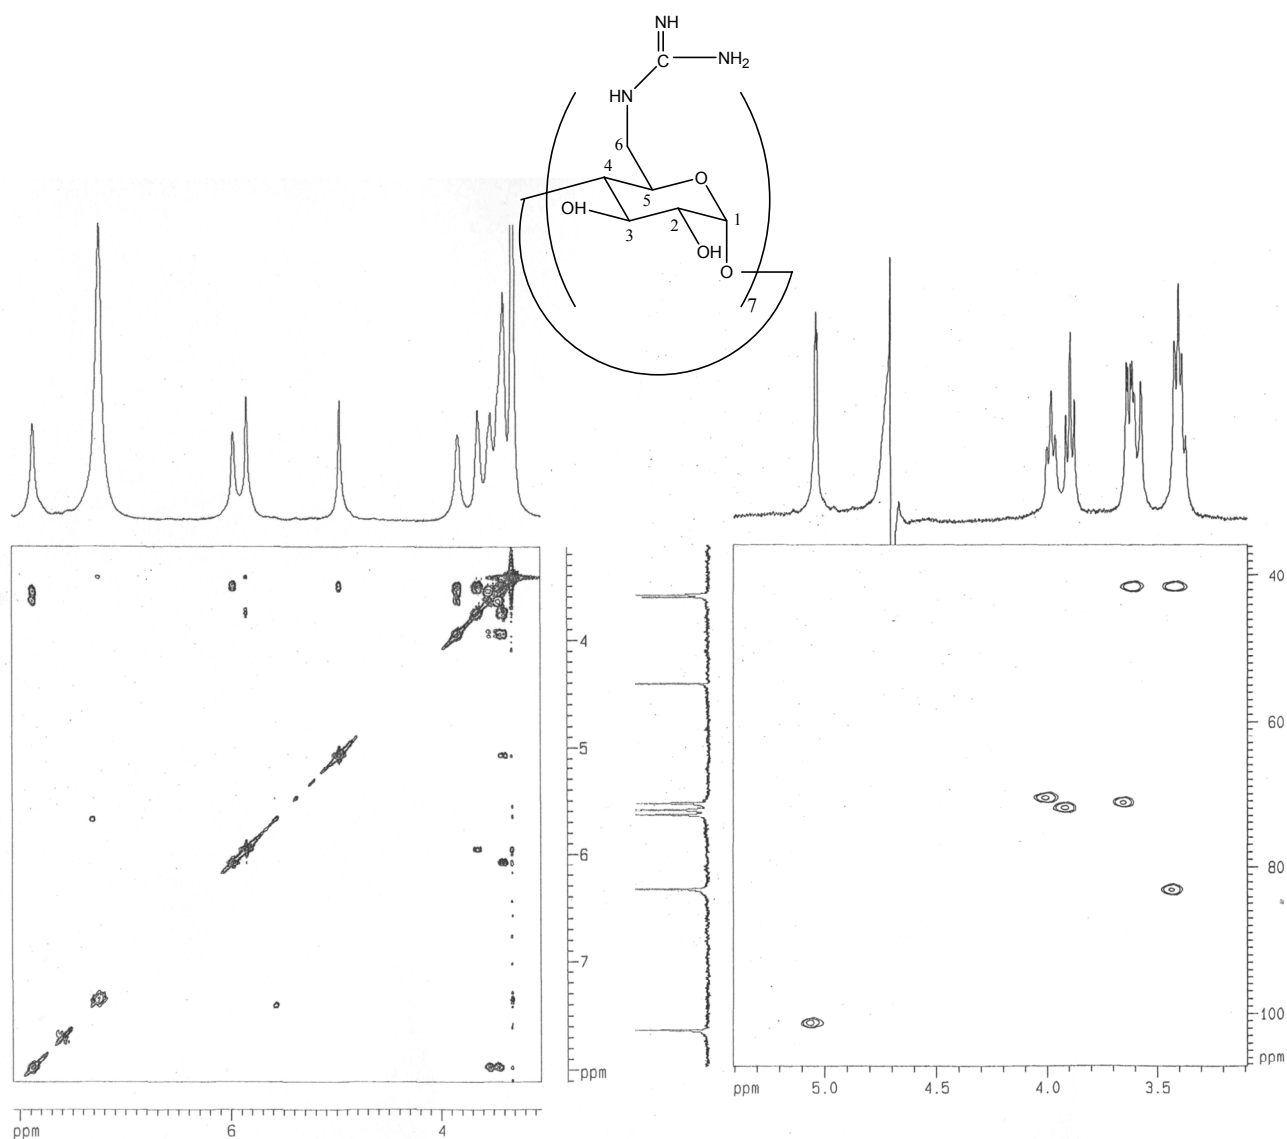

**Supporting figure 5.** *Left:* Partial  $^1\text{H}$ - $^1\text{H}$  correlation NMR spectrum in DMSO- $d_6$ , and *Right:* Partial  $^1\text{H}$ - $^{13}\text{C}$  correlation NMR spectrum in  $\text{D}_2\text{O}$  of *heptakis(6-guanidino-6-deoxy)-β-cyclodextrin hydrochloride (4b)*.

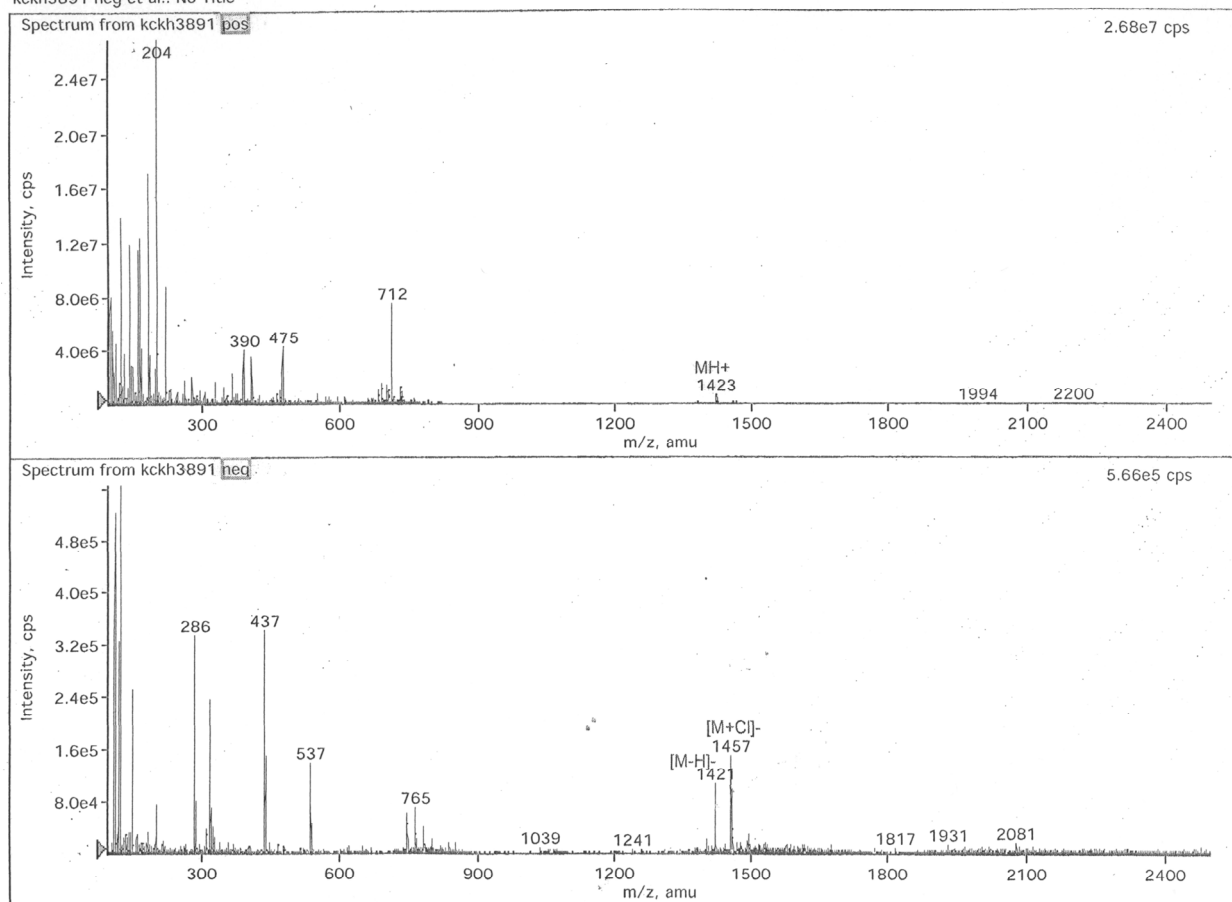

**Supporting figure 6.** ESI mass spectrum of *heptakis(6-guanidino-6-deoxy)-β-cyclodextrin* hydrochloride (**4b**), in positive (top) and negative (bottom) mode.

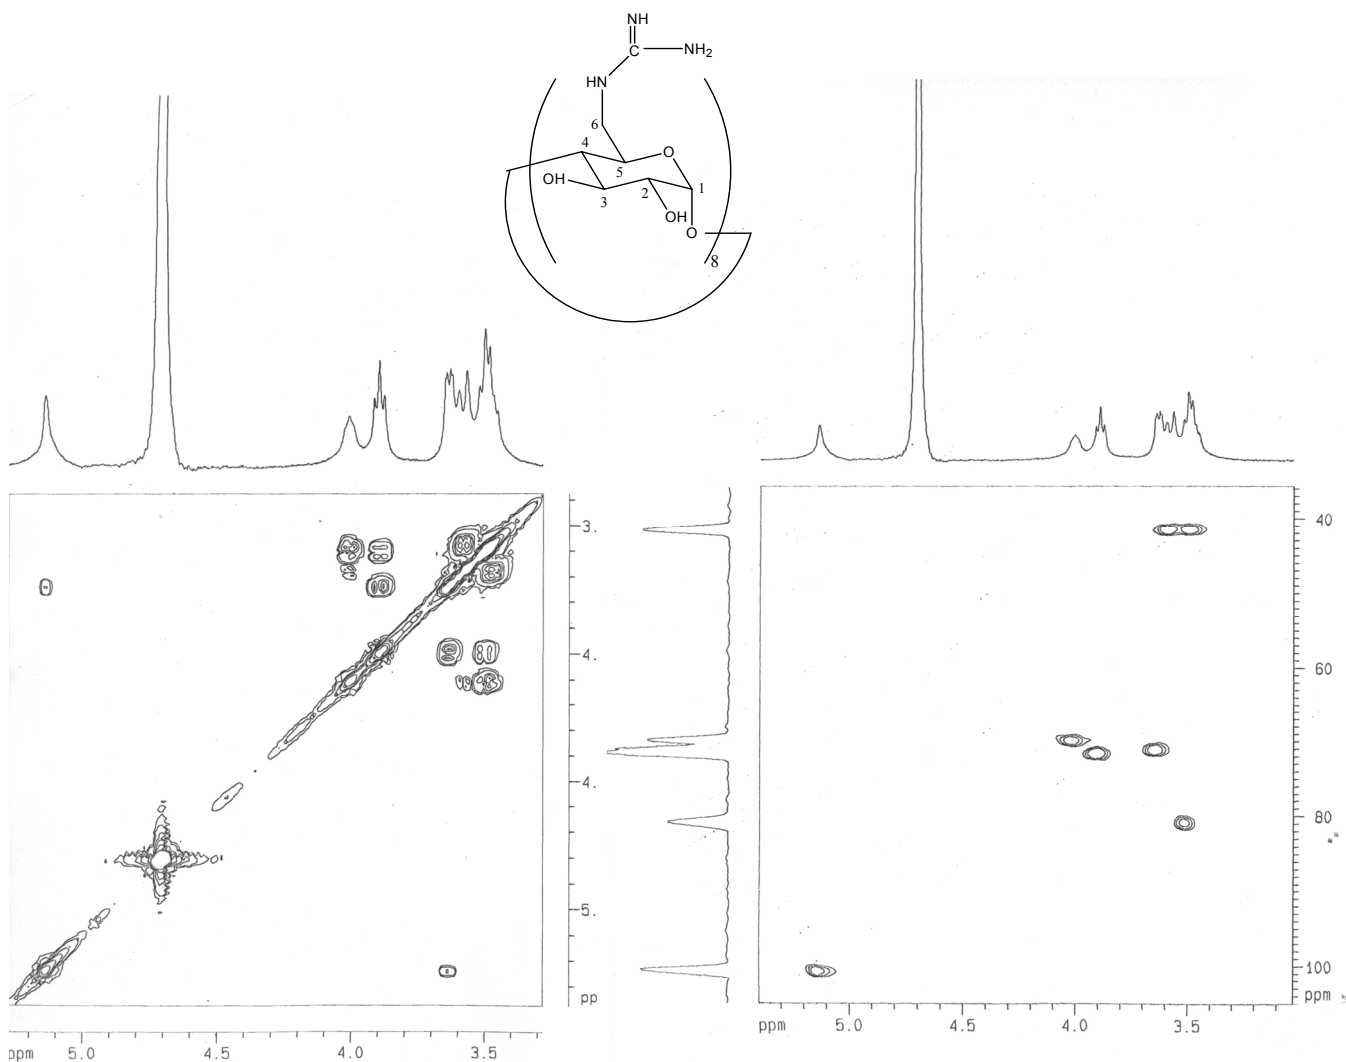

**Supporting figure 7** *Left:* Partial  $^1\text{H}$ - $^1\text{H}$  correlation NMR spectrum, and *Right:* Partial  $^1\text{H}$ - $^{13}\text{C}$  correlation NMR spectrum in  $\text{D}_2\text{O}$  of octakis(6-guanidino-6-deoxy)- $\gamma$ -cyclodextrin hydrochloride (**4c**).

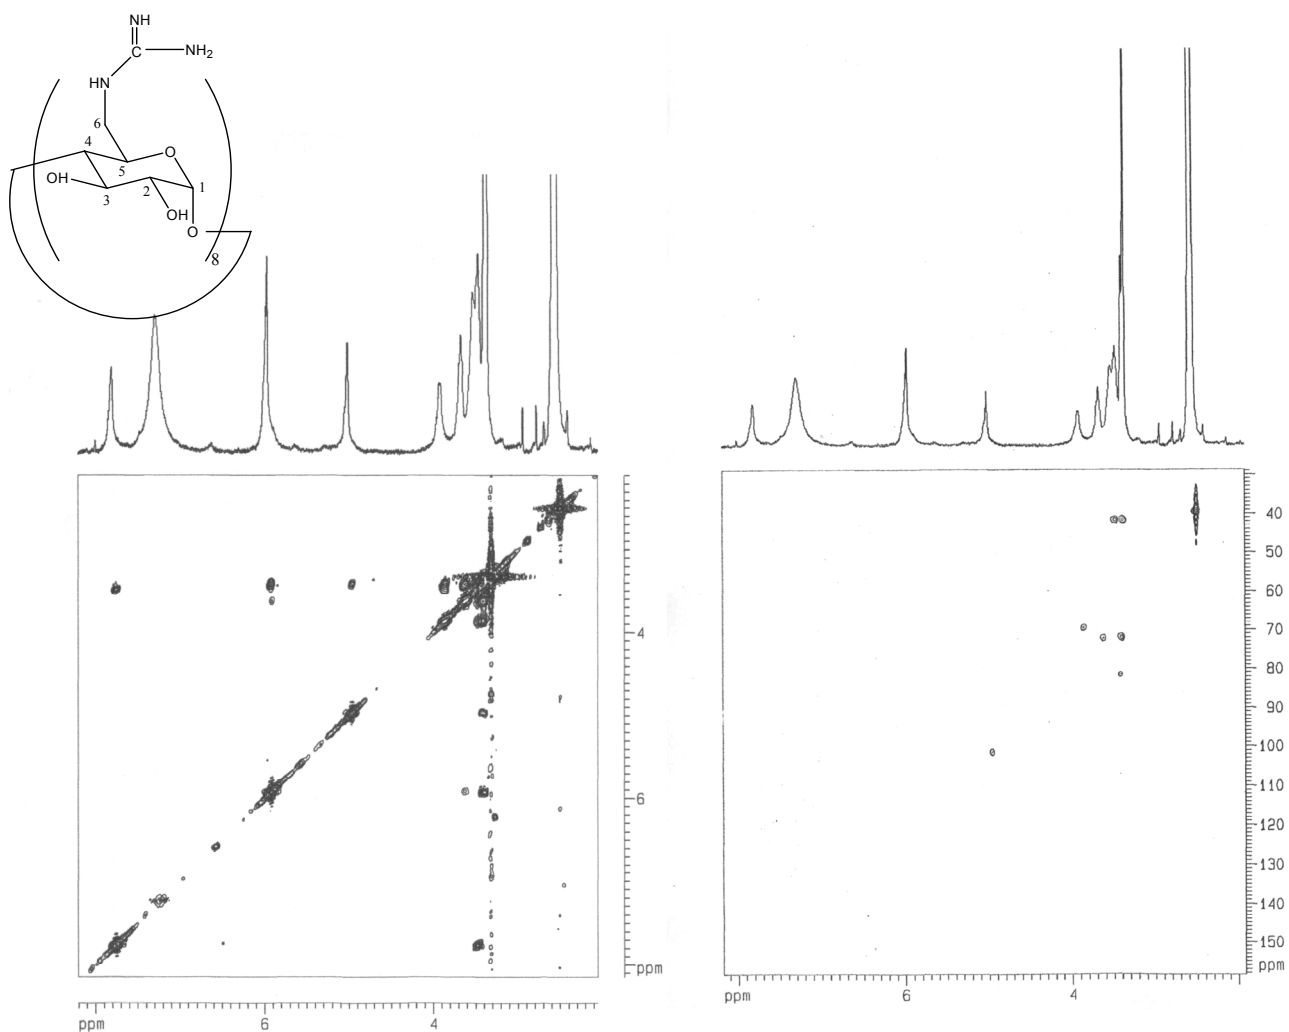

**Supporting figure 8.** *Left:* Partial  $^1\text{H}$ - $^1\text{H}$  correlation NMR spectrum, and *Right:* Partial  $^1\text{H}$ - $^{13}\text{C}$  correlation NMR spectrum of octakis(6-guanidino-6-deoxy)- $\beta$ -cyclodextrin hydrochloride (**4c**) in  $\text{DMSO-d}_6$ .

**Table 1:** Volumes used for agarose gel electrophoresis.

| <b>Lane</b> | <b>Compound</b>     | <b>V (μl)</b> | <b>Lane</b> | <b>Compound</b> | <b>V (μl)</b> |
|-------------|---------------------|---------------|-------------|-----------------|---------------|
| <b>1</b>    | λHindIII            | 2             | <b>9</b>    | Calf Thymus DNA | 1             |
| <b>2</b>    | Calf Thymus DNA     | 1             | <b>10</b>   | <b>4b</b> + DNA | 2 +1          |
| <b>3</b>    | guanidine.HCl + DNA | 10 +1         | <b>11</b>   | <b>4b</b> + DNA | 5 +1          |
| <b>4</b>    | αCD + DNA           | 10 +1         | <b>12</b>   | <b>4b</b> + DNA | 10 +1         |
| <b>5</b>    | <b>4a</b> + DNA     | 2 +1          | <b>13</b>   | γCD + DNA       | 10 +1         |
| <b>6</b>    | <b>4a</b> + DNA     | 5 +1          | <b>14</b>   | <b>4c</b> + DNA | 2 +1          |
| <b>7</b>    | <b>4a</b> + DNA     | 10 +1         | <b>15</b>   | <b>4c</b> + DNA | 5 +1          |
| <b>8</b>    | βCD + DNA           | 10 +1         | <b>16</b>   | <b>4c</b> + DNA | 10 +1         |
